# Supplementary material
Source: publisher figshare collection journal article supplement (https://gsapubs.figshare.com/ndownloader/files/23319638)
Supplement: Supplementary file 1 [file 23319638]

## Sheet: Sheet1
TABLE DR10. IRRADIATION AND CORRECTION FACTOR INFORMATION
Irradiation Run	Length (hours)	(39Ar/37Ar)Ca	(36Ar/37Ar)Ca	(40Ar/39Ar)K
NM-254	40	0.00698 ± 0.000008	0.00273 ± 0.0000002	0.008068 ± 0.00068
NM-258	40	0.00653 ± 0.000000	0.0002633 ± 0.0000003	0.007529 ± 0.000237
NM-293	8	0.000758 ± 0.000007	0.000286 ± 0.0000005	0.00873 ± 0.00017
Notes: all samples irradiated at the Triga Reactor, USGS, Denver, CO.
